# Supplementary material for: Digging for DNA at depth: rapid universal metabarcoding surveys (RUMS) as a tool to detect coral reef biodiversity across a depth gradient
Source: PubMed Central journal article supplement (PMC6368839; doi:10.7717/peerj.6379), 2019-02-06

**a**

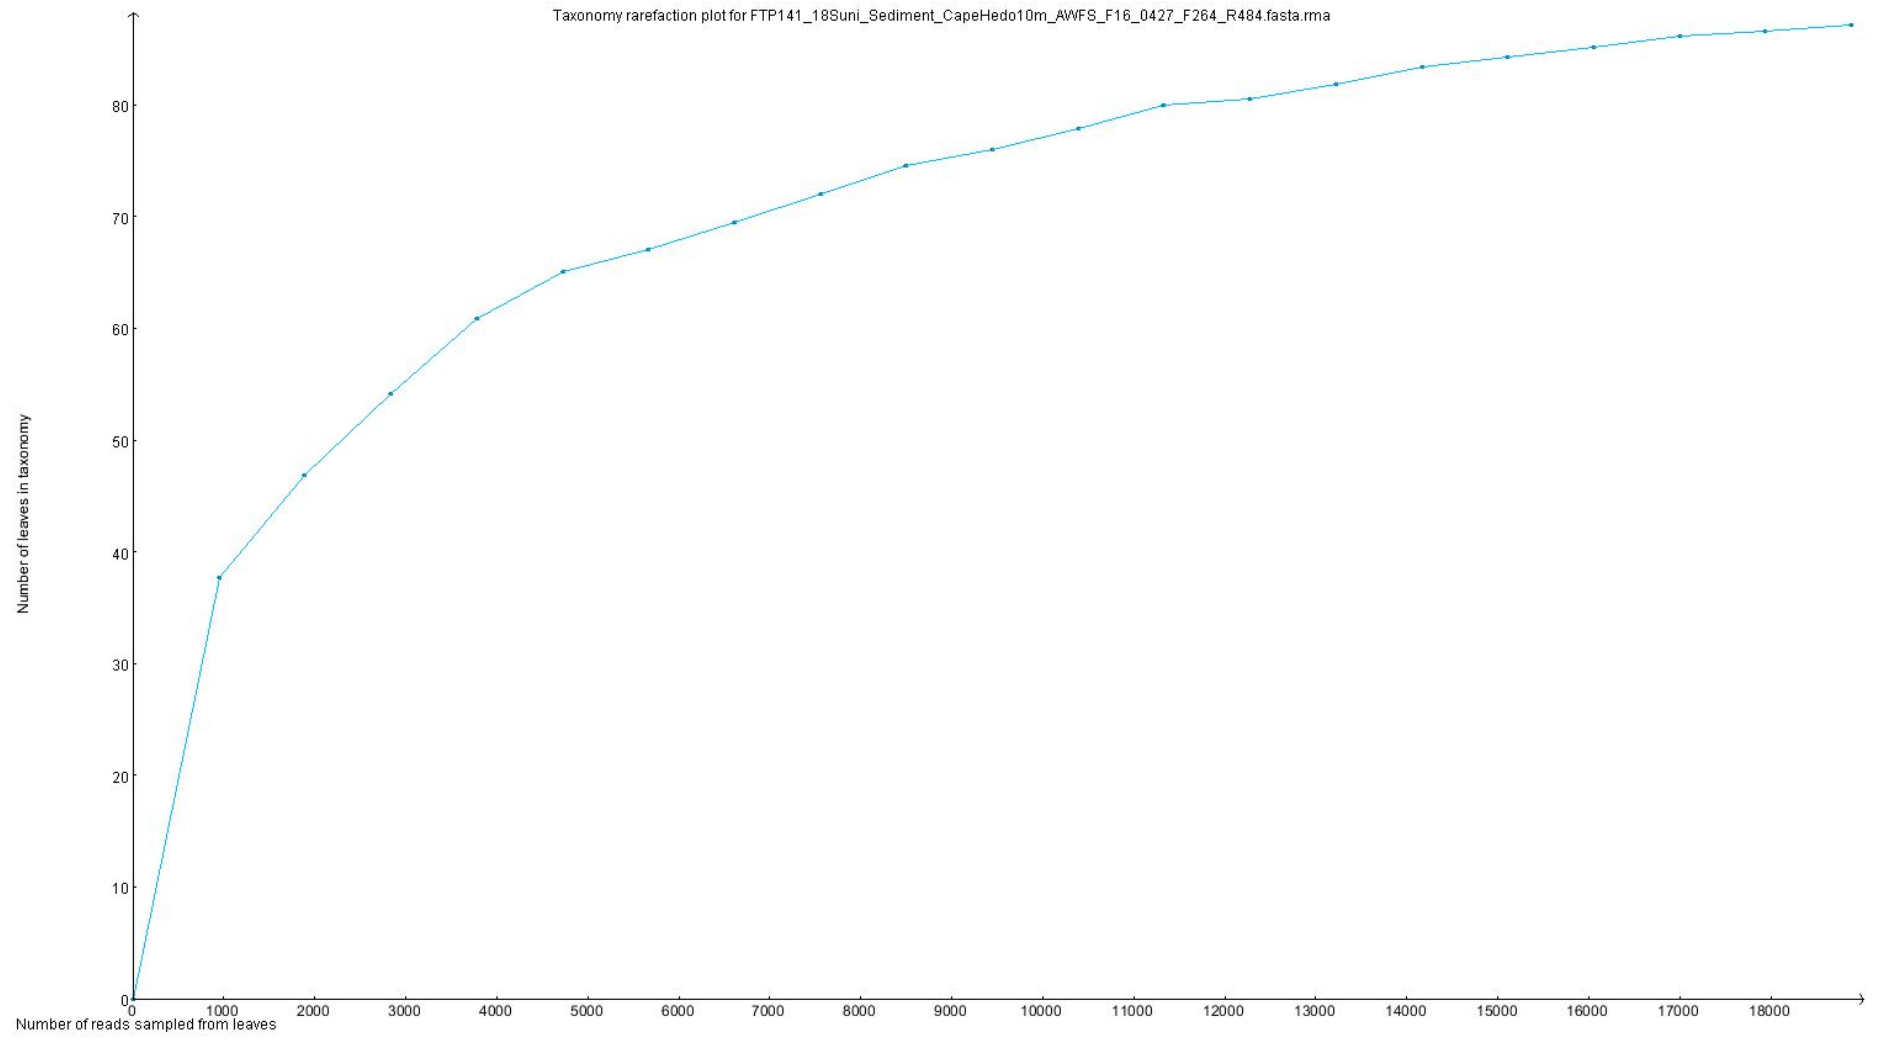

**b**

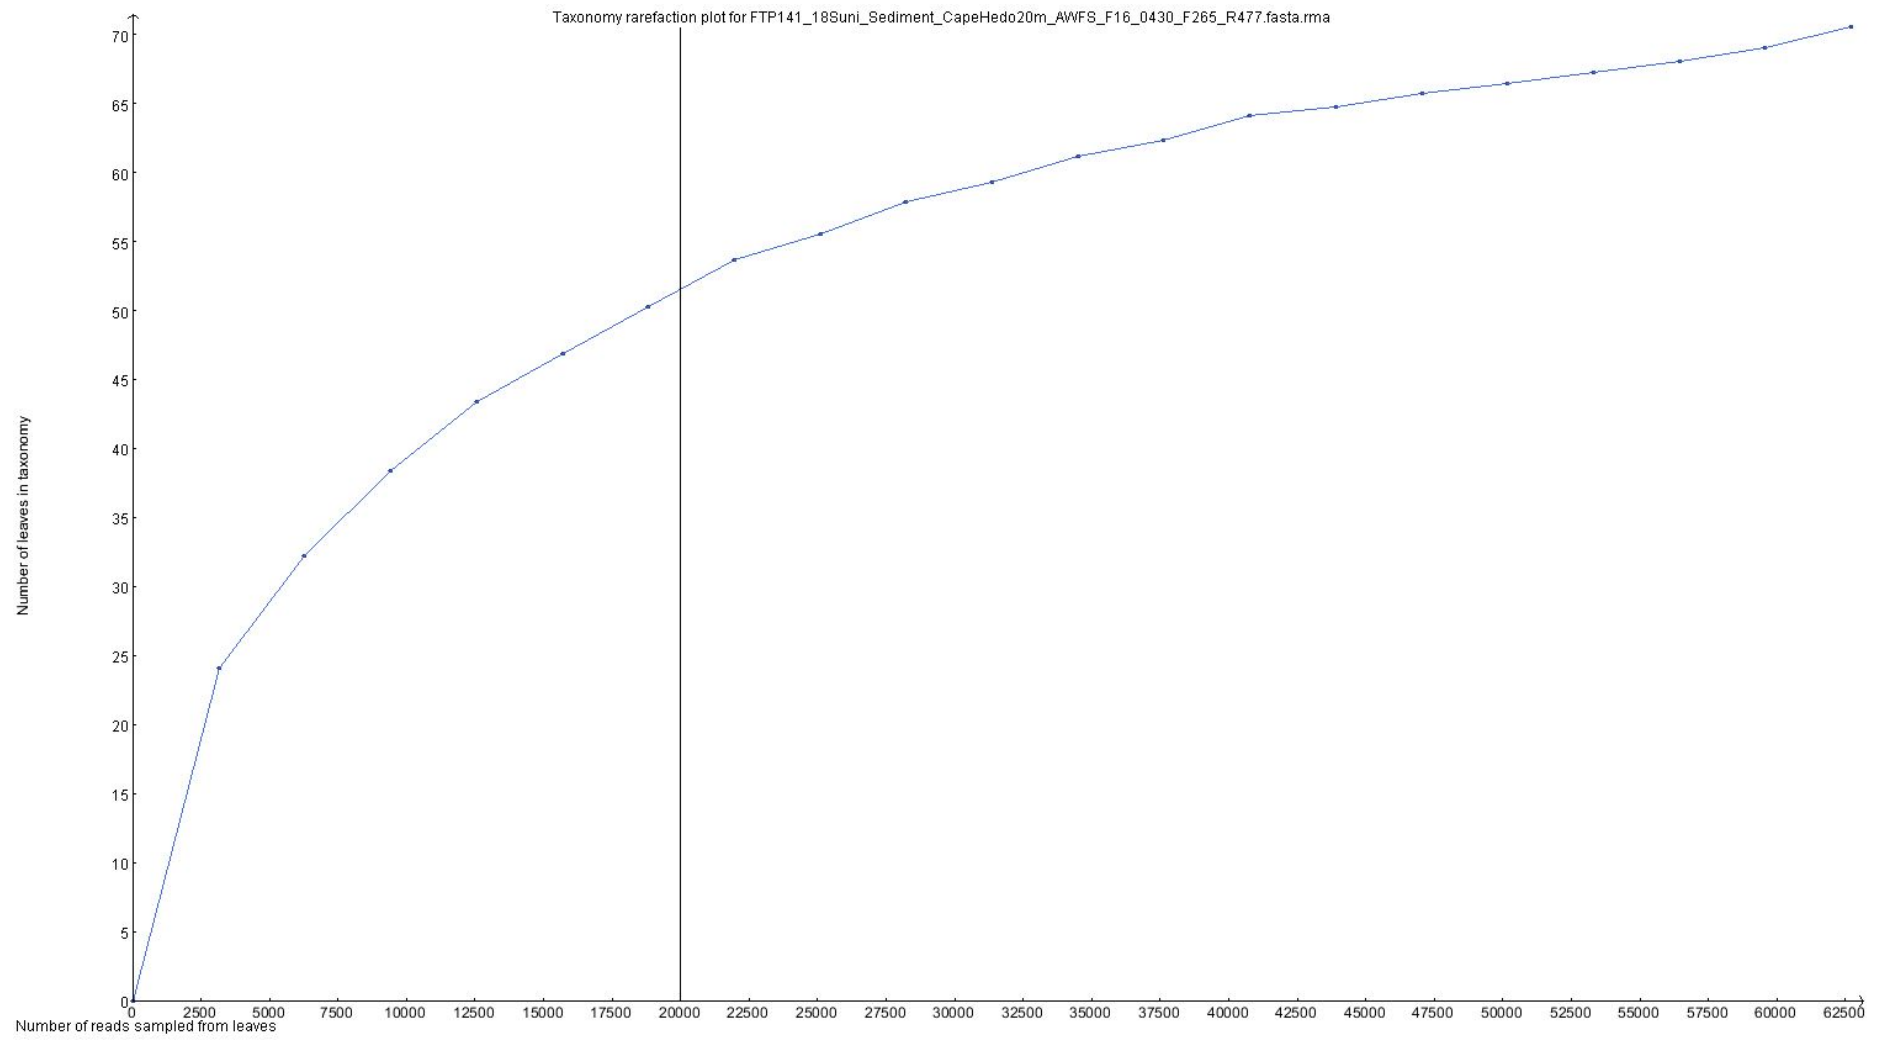

**c**

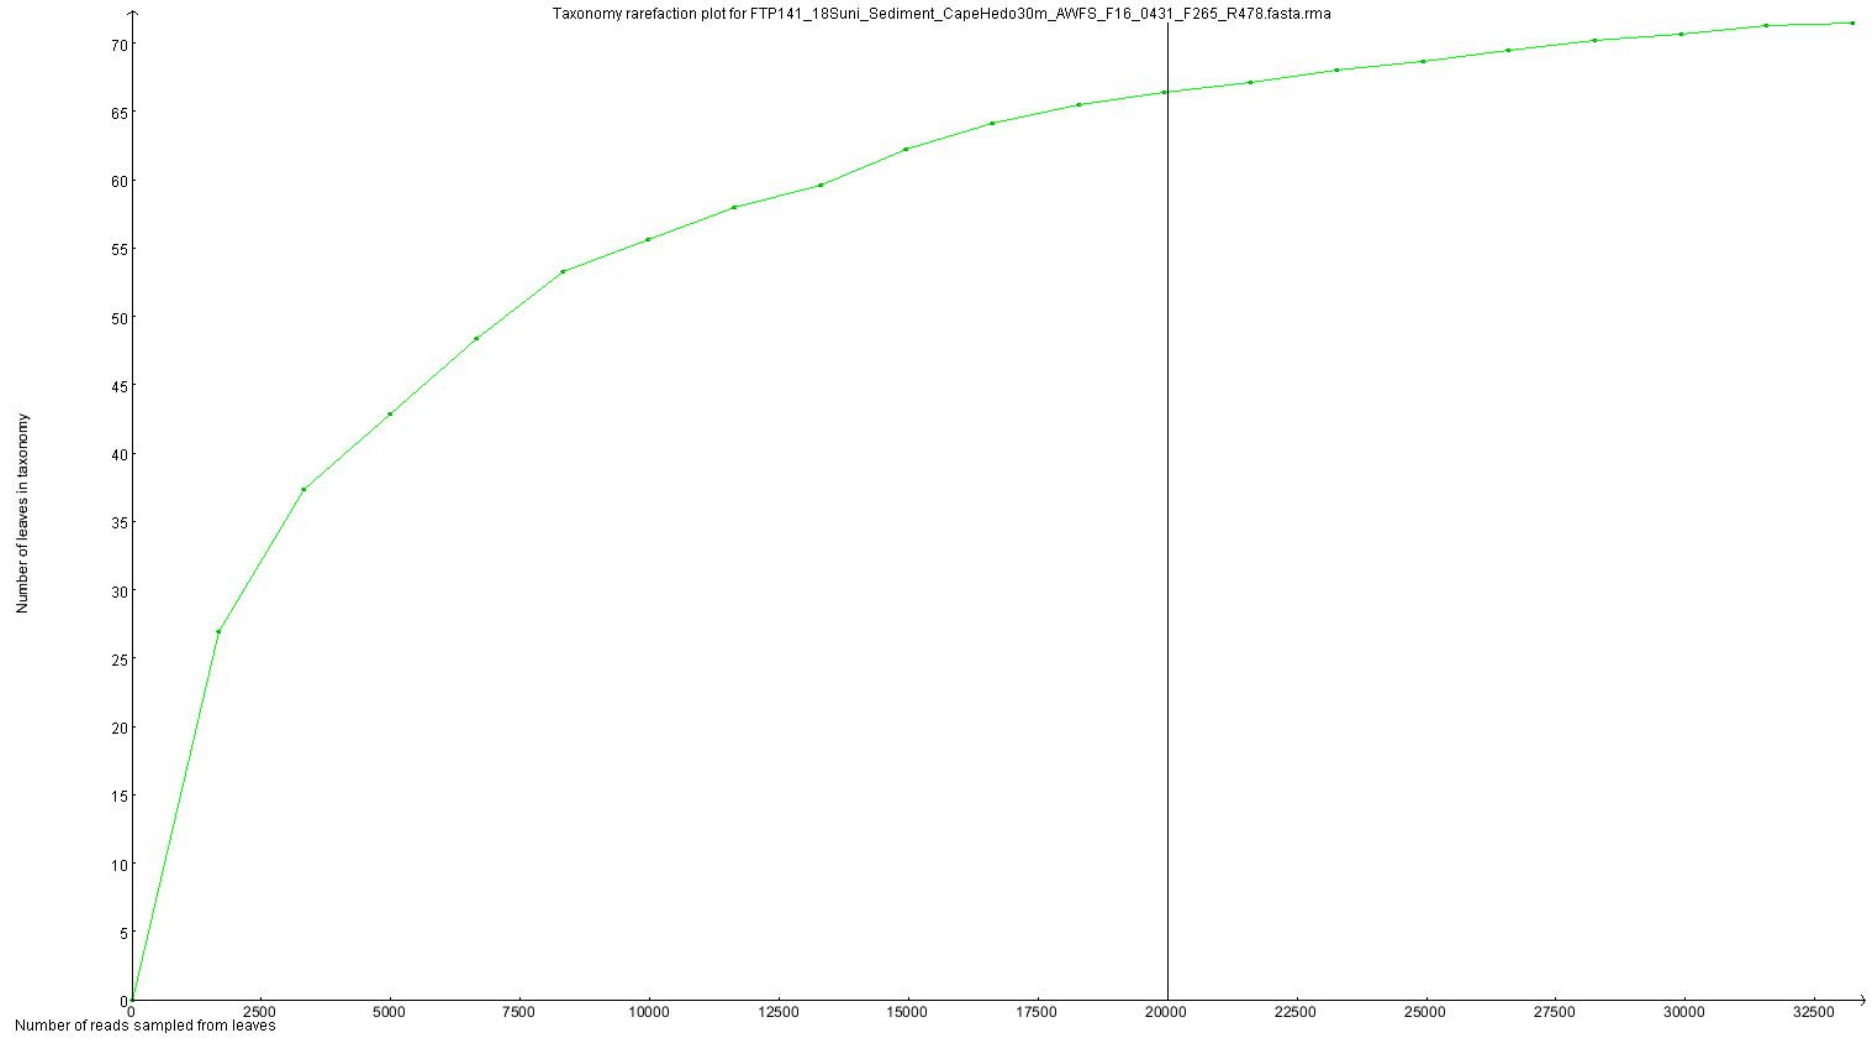

**d**

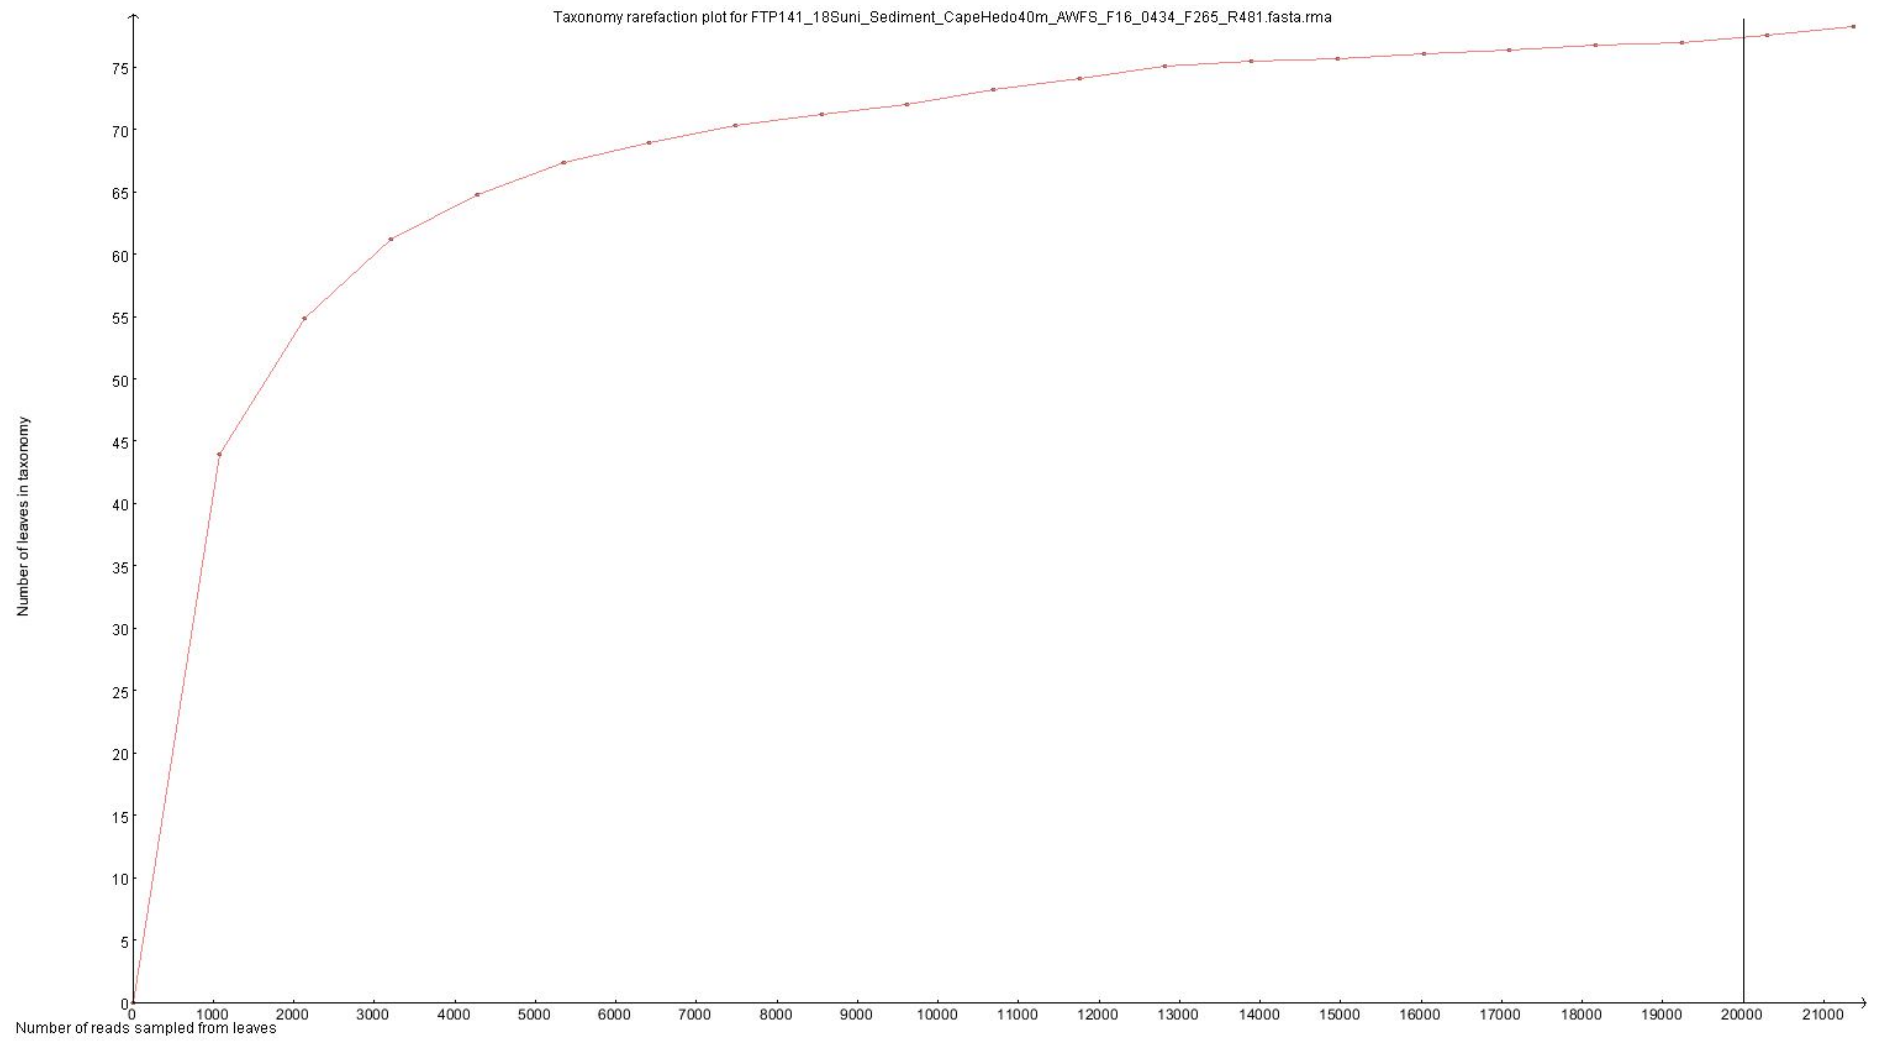

e

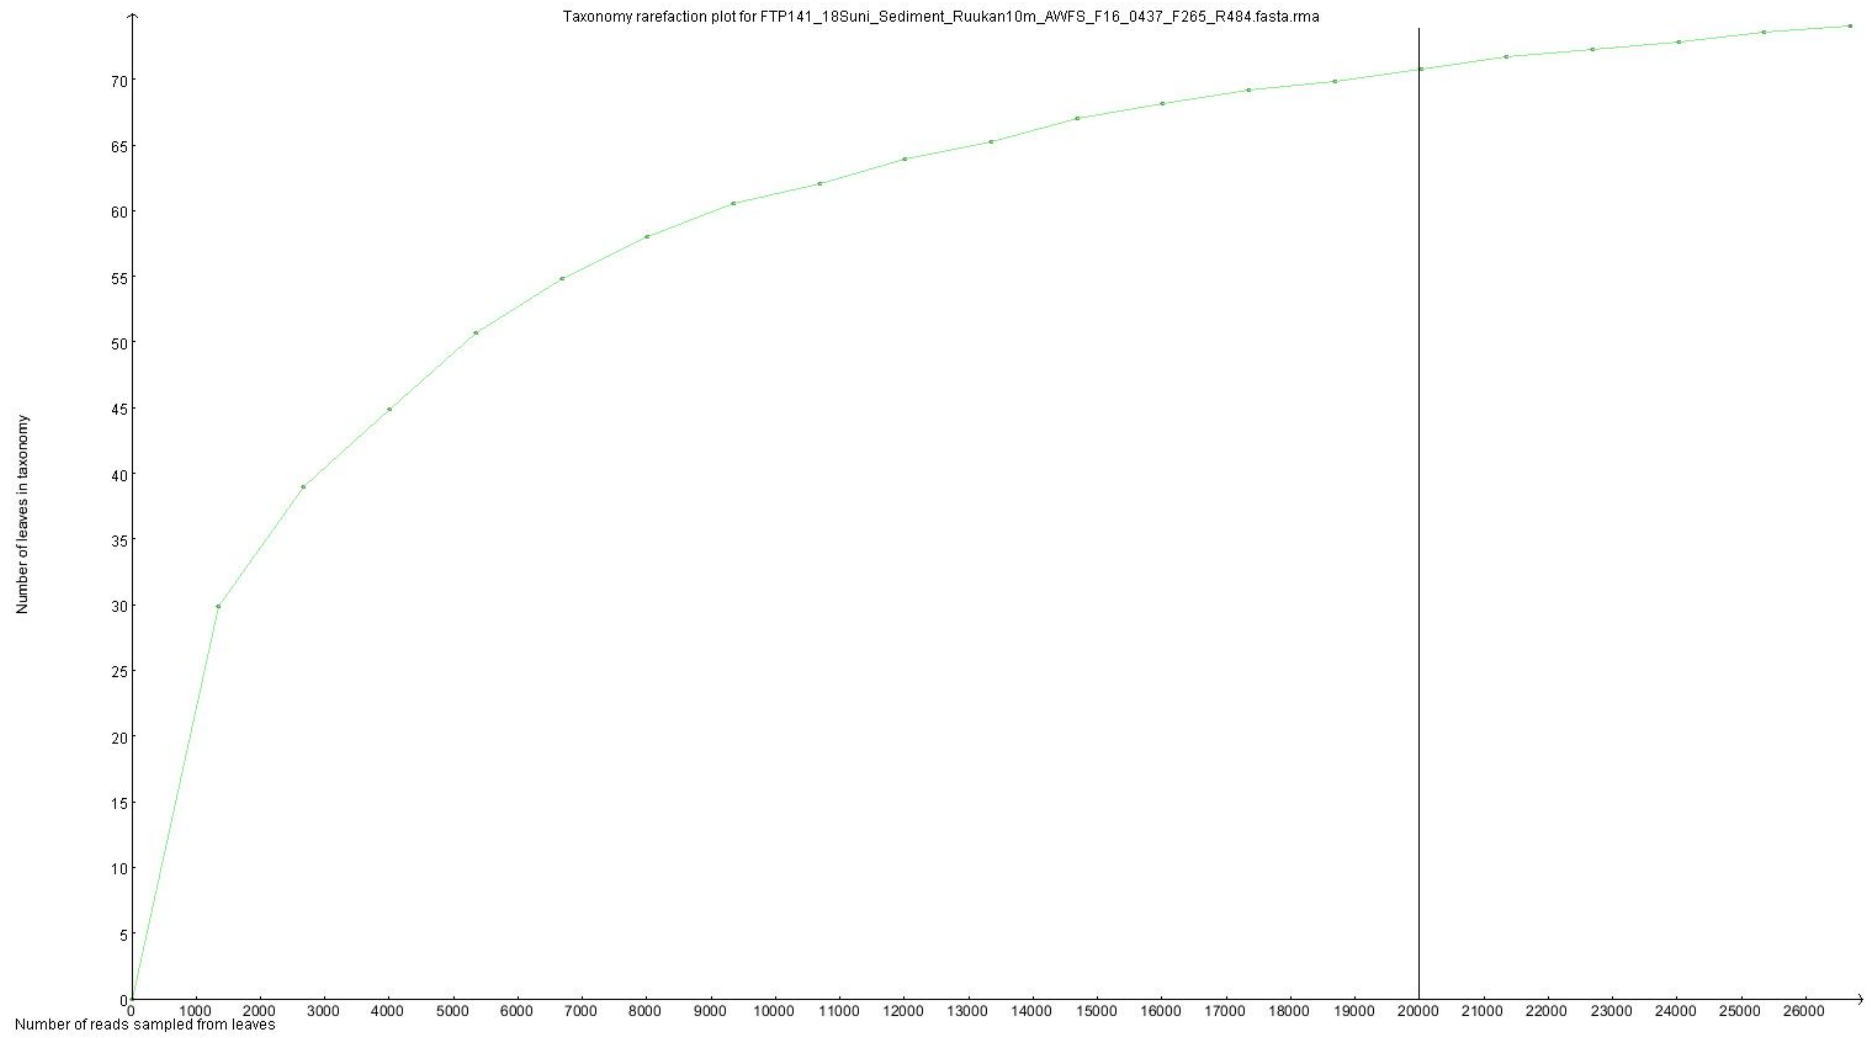

**f**

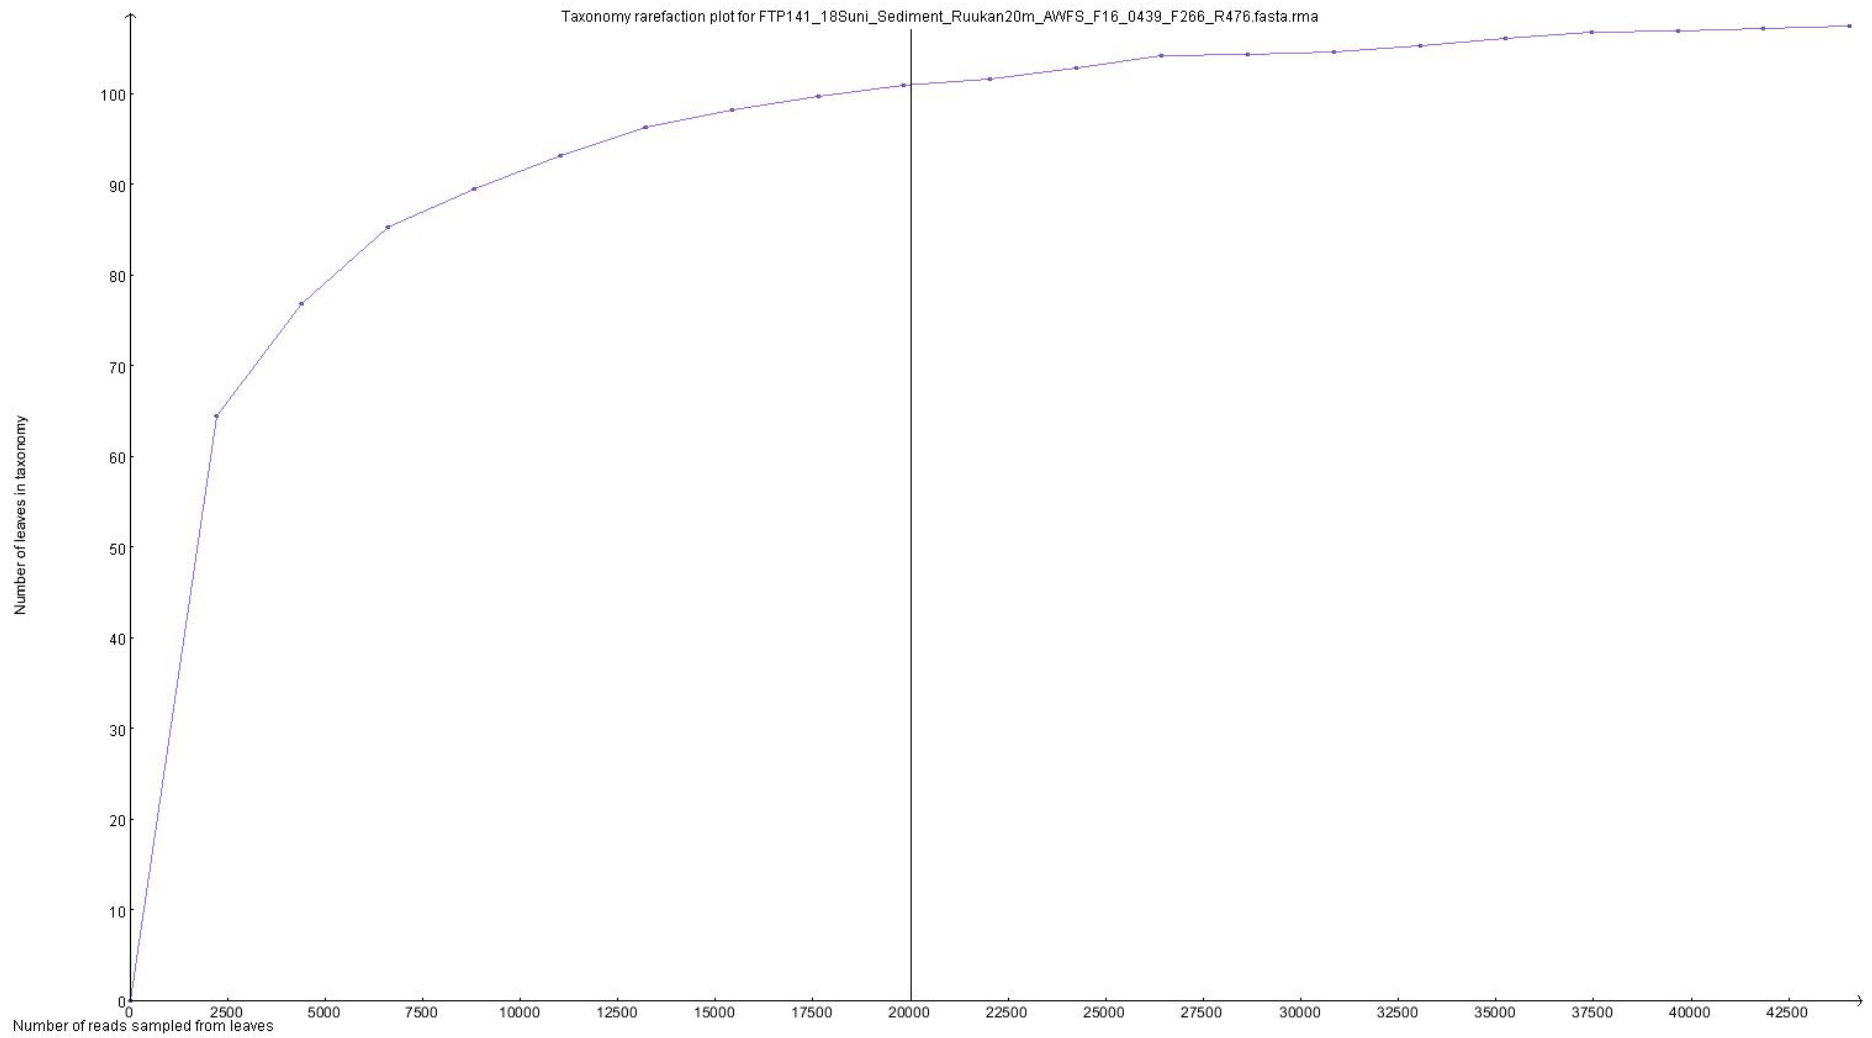

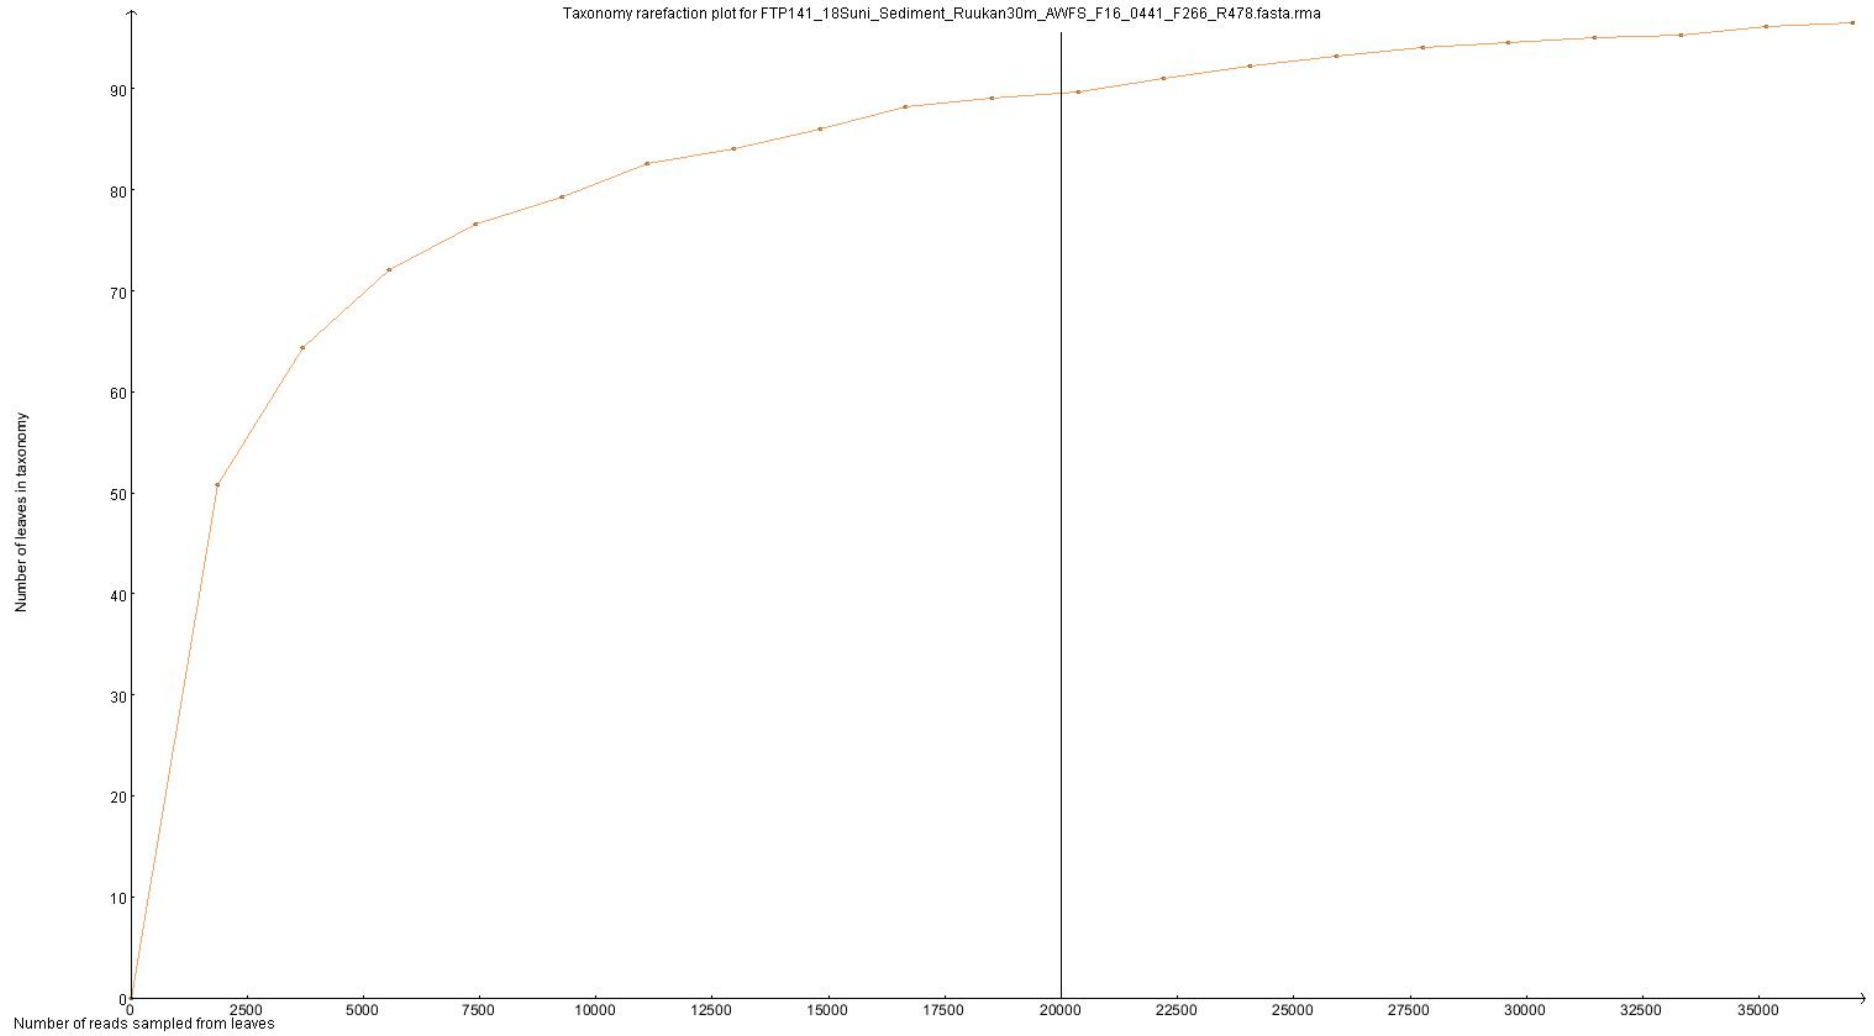

Supplement: peerj-07-6379-s002.pdf [file peerj-07-6379-s002.pdf]
